# Supplementary material for: Interannual variation, decadal trend, and future change in ozone outflow from East Asia
Source: Copernicus journal article supplement (doi:10.5194/acp-2016-938), 2016-11-01
Supplement: Supplementary file 1 [file acp-2016-938-supplement.pdf]

## Supplementary Material

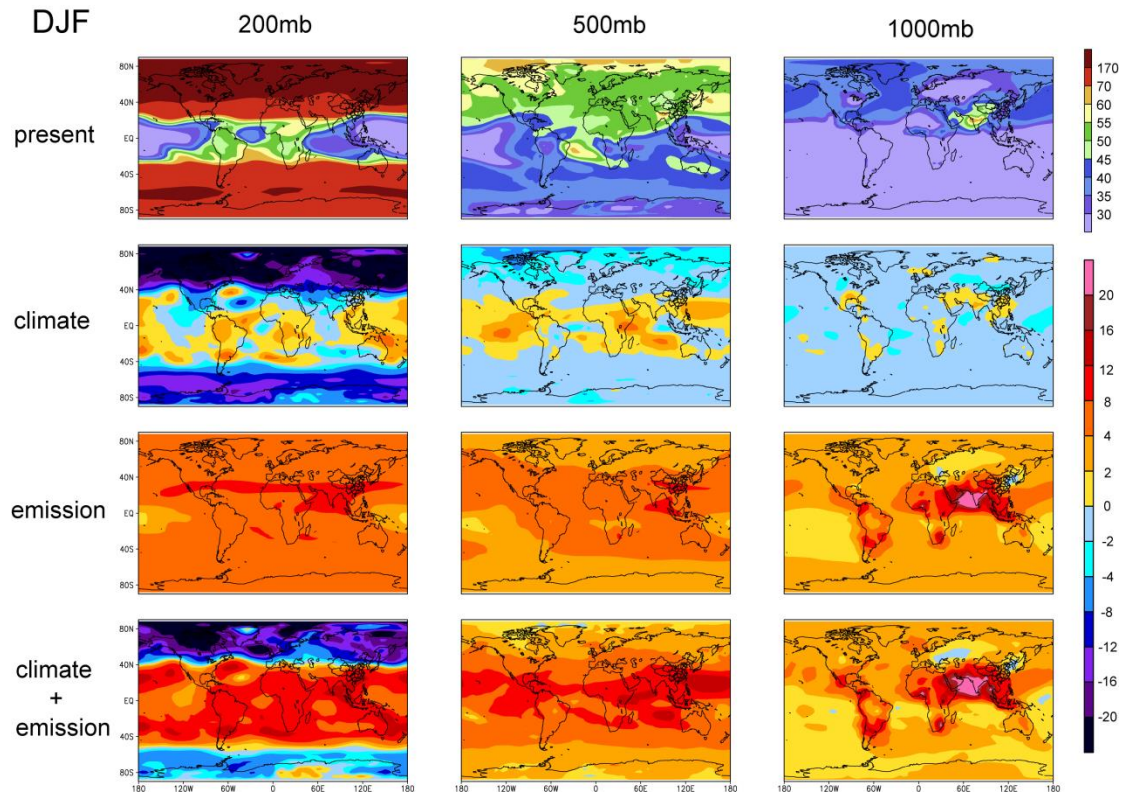

**Fig. S1.** Simulated present-day O<sub>3</sub> concentrations (ppbv) and projected changes (ppbv) from the present day (1996–2005) to future (2046–2055) due to future climate change alone, change in anthropogenic emissions alone, and changes in both climate and emissions at 200 mb, 500 mb and 1000 mb during four seasons.

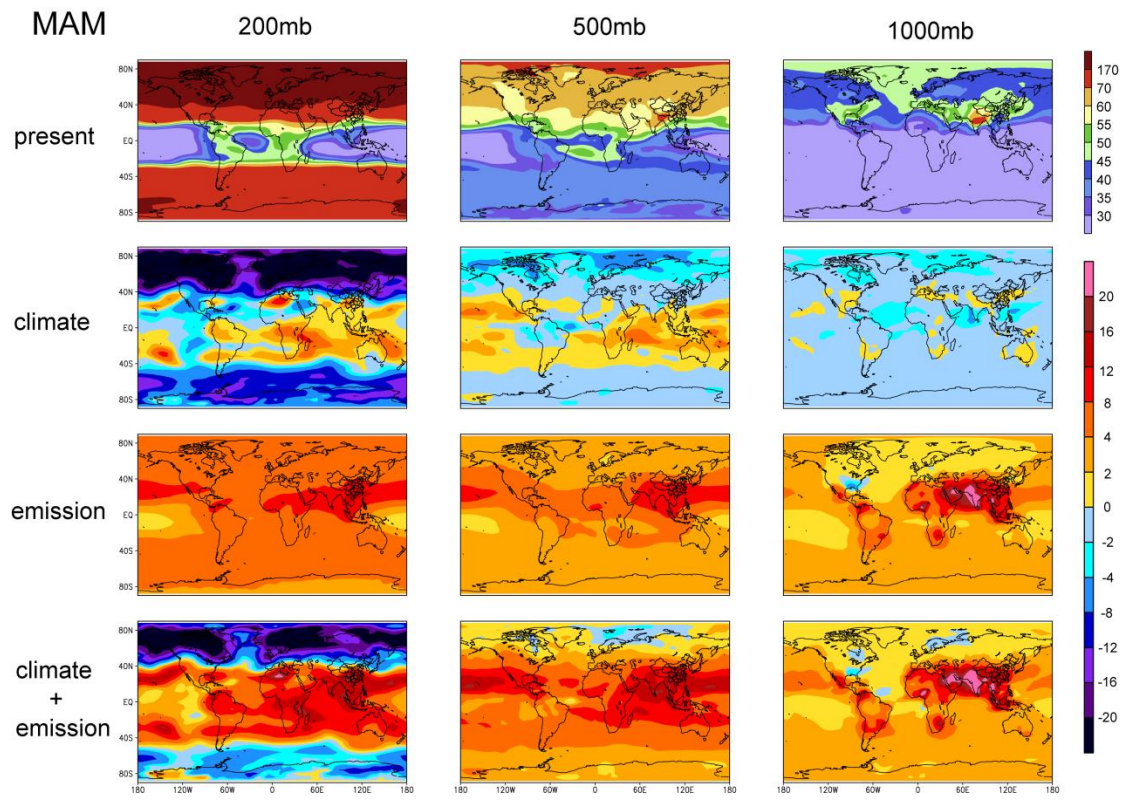

**Fig. S1. continued.**

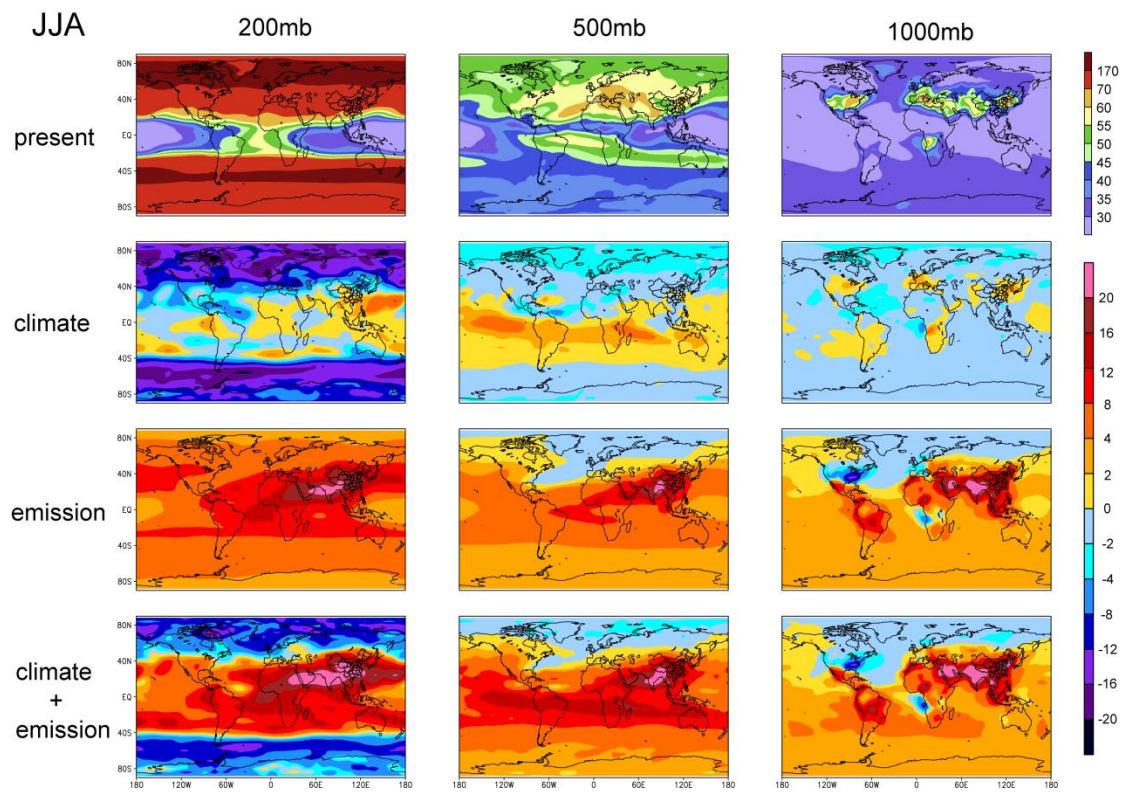

**Fig. S1. continued.**

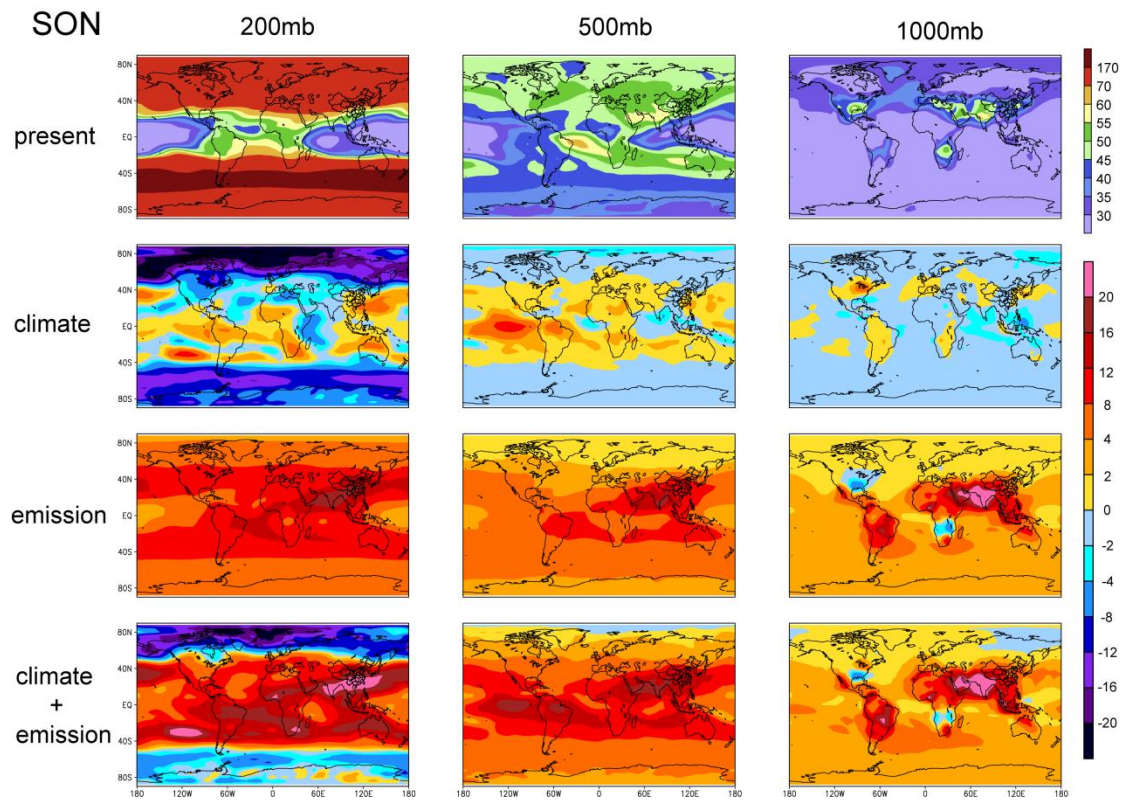

**Fig. S1. continued.**
